1 **Community evolution increases plant productivity at low diversity**

2 Sofia J. van Moorsel<sup>1†</sup>, Terhi Hahl<sup>1†</sup>, Cameron Wagg<sup>1</sup>, Gerlinde B. De Deyn<sup>2</sup>, Dan F.B.

3 Flynn<sup>1</sup>, Debra Zuppinger-Dingley<sup>1</sup> and Bernhard Schmid<sup>1\*</sup>

4

5 <sup>1</sup> Department of Evolutionary Biology and Environmental Studies, University of Zürich,

6 Winterthurerstrasse 190, 8057 Zürich, Switzerland

7 <sup>2</sup> Department of Environmental Sciences, Wageningen University, Droevendaalsesteeg 4,

8 6708 PB Wageningen, the Netherlands

9

10 † Shared first authorship

11 \*Email: [bernhard.schmid@ieu.uzh.ch](mailto:bernhard.schmid@ieu.uzh.ch)

12

13 Emails of other authors (in order):

14 [sofia.vanmoorsel@ieu.uzh.ch](mailto:sofia.vanmoorsel@ieu.uzh.ch)

15 [terhi.hahl@ieu.uzh.ch](mailto:terhi.hahl@ieu.uzh.ch)

16 [cameron.wagg@ieu.uzh.ch](mailto:cameron.wagg@ieu.uzh.ch)

17 [gerlinde.dedeyn@wur.nl](mailto:gerlinde.dedeyn@wur.nl)

18 [danfbflynn@gmail.com](mailto:danfbflynn@gmail.com)

19 [debra.zuppinger@ieu.uzh.ch](mailto:debra.zuppinger@ieu.uzh.ch)

20

21 **Type of contribution:** Article

22

23 **Species extinctions from local communities can negatively affect ecosystem functioning<sup>1</sup>.**  
24 **Ecological mechanisms underlying these impacts are well studied<sup>2-4</sup> but the role of**  
25 **evolutionary processes is rarely assessed<sup>5,6</sup>. Using a long-term field experiment, we**  
26 **tested whether natural selection in plant communities increased the effects of**  
27 **biodiversity on productivity. We re-assembled communities with 8-year co-selection**  
28 **history adjacent to naïve communities with identical species composition but no history**  
29 **of co-selection. Mixtures of two to four co-selected species were more productive than**  
30 **their corresponding naïve communities over four years in soils with or without co-**  
31 **selected microbial communities. At the highest diversity level of eight plant species, no**  
32 **such differences were observed. Our findings suggest that plant community evolution**  
33 **can lead to rapid increases in ecosystem functioning at low diversity but may take**  
34 **longer at high diversity. This effect was not modified by treatments that simulated**  
35 **additional co-evolutionary processes between plants and soil organisms.**

36 A large number of experiments have shown that species richness positively influences  
37 ecosystem functioning, in particular plant biomass production<sup>1,3,4,7-10</sup>. These biodiversity  
38 effects have been explained by sampling effects that increase the chance of including  
39 productive species in diverse communities<sup>2,3</sup> or by complementary effects between species,  
40 which allow mixtures to extract resources from the environment more efficiently<sup>11,12</sup>.  
41 Furthermore, diversity-dependent reductions in soil fertility<sup>13</sup> or density-dependent  
42 accumulations of specialist pathogens over time<sup>14</sup> have been shown to contribute to  
43 decreasing productivity at low plant diversity and in plant monocultures.

44 Complementarity effects between co-occurring species increase over time<sup>8-10,15</sup>.  
45 Evidence that this might be due to evolutionary processes in plant communities has been  
46 found in a glasshouse experiment comparing the performance of populations selected in  
47 monocultures vs. diverse plant communities in newly assembled test monocultures and two-

48 species mixtures<sup>6</sup>. This suggests that community evolution may shape diversity–productivity  
49 relationship more generally, which could be tested if entire communities of co-selected plant  
50 species would be compared with communities of the same plant species but without co-  
51 selection history. Community evolution has been defined as genetically based changes among  
52 species constituting the community, which alter species performances and interactions<sup>16</sup>.  
53 Such changes may occur via genetic recombination, mutations<sup>17</sup>, or a sorting-out from  
54 standing genetic variation through differential survival and growth of individuals<sup>18</sup>. Natural  
55 selection can lead not only to changes in gene frequencies in populations within species, but  
56 selection at the level of communities can in addition lead to correlated changes in gene  
57 frequencies in multiple species<sup>16</sup> in response to one another or to co-varying environmental  
58 conditions. But empirical evidence for community evolution so far has only been  
59 demonstrated in planktonic and bacterial communities<sup>19–22</sup> and not yet in higher plants. Here  
60 we report results from a field experiment where we tested whether plant community  
61 evolution influences plant community productivity.

62         Recent evidence suggests selection of particular genotypes from the total genetic pool  
63 of a species may affect ecosystem functioning in field experiments<sup>21,23–27</sup>. We propose that  
64 selection of genotypes from the gene pool of entire communities may affect ecosystem  
65 functioning if non-random niche or trait changes in response to other phenotypes in the  
66 community result in reduced niche overlap and a more complete use of biotope space<sup>28,29</sup>,  
67 thus leading to increased plant community productivity. We therefore compared the  
68 productivity of plant communities assembled from plants which have co-occurred for eight  
69 years in a long-term grassland biodiversity experiment (the Jena Experiment<sup>30</sup>) with the  
70 productivity of plant communities of identical species composition, but without any co-  
71 occurrence history (“naïve communities”). The naïve species were obtained from the seed  
72 supplier of the original seeds used to establish the Jena Experiment. We used experimental

73 plant monocultures and 2-, 4- or 8-species mixtures with twelve different species  
74 compositions for each diversity level.

75 Plant community evolution in the field may also depend on the local environment,  
76 such as the soils in which co-evolution with soil microorganisms occurred. For instance,  
77 plant–soil feedback experiments have shown that soil biota change in response to different  
78 plant species, which can in turn modify the composition and productivity of plant  
79 communities<sup>31–33</sup>. To assess whether additional co-evolutionary processes between plants and  
80 soil organisms modified plant community evolution, we grew the selected and naïve plant  
81 communities in soils with co-selected soil organisms (native soil) and with external soil  
82 organisms (neutral soil; see Methods and Extended Data Fig. 1). Community-level plant  
83 productivity was measured each year from 2012 to 2015 by collecting species-specific  
84 aboveground biomass at the time of peak biomass in spring (see Methods).

85

## 86 **Results**

87 Overall, for each doubling of species richness community aboveground biomass  
88 increased by  $100 \text{ g} \cdot \text{m}^{-2} \cdot \text{y}^{-1}$ , a typical value for grassland biodiversity experiments<sup>34</sup>. In  
89 general, communities of co-selected plants were more productive than naïve communities of  
90 the same species composition. The significant interaction between species richness and  
91 community-evolution treatment or in short plant history ( $F_{3,191.2} = 2.77$ ,  $P = 0.043$ ; Extended  
92 Data Table 1a) indicated that this was mainly due to increased productivity of 2- and 4-  
93 species mixtures and a smaller increase in monocultures of co-selected plants. In contrast, 8-  
94 species mixtures of co-selected or naïve plants were equally productive (Fig. 1a). The  
95 calculated relative productivity (percentage of the mean productivity of 8-species mixtures  
96 for each plant history-by-soil treatment-by-year combination) confirmed that especially 2-  
97 and 4-species mixtures of co-selected plants increased productivity relative to 8-species

98 mixtures ( $F_{3,191.9} = 2.90$ ,  $P = 0.036$ ; Fig. 1b; Extended Data Table 1b). The positive effect of  
99 community evolution on relative productivity was significantly larger in 2- and 4-species  
100 mixtures than in monocultures ( $F_{1,43.7} = 6.37$ ,  $P = 0.015$  for the interaction between plant  
101 history and the contrast of “2- or 4- species mixtures vs. others”). The differences in relative  
102 productivity between communities of co-selected plants and naïve communities increased  
103 over time for these low-diversity mixtures as well as for monocultures in all three soils (Fig.  
104 2). For monocultures, this was due to the deteriorating performance of naïve plants, possibly  
105 due to the accumulation of soil pathogens, whereas for 2- and 4-species mixtures it was due  
106 to an increasing relative performance of communities of co-selected plants.

107 To test whether the communities of co-selected plants were particularly productive in  
108 2- and 4-species mixtures at the beginning of the Jena Experiment (i.e. when they were  
109 “naïve” communities themselves), we compared the productivity data of 2003–2006 with the  
110 data of 2012–2015. To standardize for differences in overall productivity between time  
111 periods we again used relative productivity (percentage of mean of 8-species mixtures per  
112 year). The plant communities were established in neutral soil in 2002 at the beginning of the  
113 experiment. We therefore used only data from neutral soil from 2012 to 2015. The  
114 communities of co-selected plants were significantly different in their response compared to  
115 the two types of naïve communities because of their increased relative productivity in 2- and  
116 4- species mixtures ( $F_{1,46.5} = 5.73$ ,  $P = 0.021$  for the interaction of plant history with the  
117 contrast “2- or 4- species mixtures vs. others”; Extended Data Fig. 2). Differences between  
118 the communities of the naïve ancestors of the co-selected plants and our current re-assembled  
119 naïve plant communities were small and not significant ( $F_{1,46.1} = 0.23$ ,  $P = 0.637$  for the  
120 interaction of the contrast “naïve ancestors vs. current naïve communities” with the contrast  
121 “2- or 4- species mixtures vs. others”).

122 Plant community productivity was initially greater in inoculated soils, in particular at  
123 high diversity, which was reflected in an overall main effect of soil treatment and significant  
124 interactions with year, and with year and species richness (Extended Data Table 1). This was  
125 probably caused by the nutrient flush associated with gamma-sterilization of the soil<sup>35</sup>. But  
126 we found no evidence that our soil treatments modified the differences in biodiversity effects  
127 between communities of co-selected plants and naïve communities ( $F_{1,183} = 0.27$ ,  $P = 0.847$   
128 and  $F_{1,183.8} = 1.401$   $P = 0.244$  for the three-way interactions of plant history with species  
129 richness and the soil-treatment contrasts neutral vs. native and sterilized native vs.  
130 unsterilized native, respectively).

131 To explore potential mechanisms for the increased biodiversity effects in 2- and 4-  
132 species mixtures of co-selected plants, we calculated the proportional increase (decrease) in  
133 plant productivity for each community composition and soil treatment as the log ratio  
134 between communities of co-selected plants and naïve communities (Fig. 3). As expected,  
135 there was no increase in productivity in 8-species mixtures, but a strong increase in 2-species  
136 mixtures followed by 4-species mixtures (which had a higher absolute increase than 2-species  
137 mixtures, see Fig. 1a) and monocultures. Using contrasts between the different diversity  
138 levels, we could confirm that the three low diversity levels were significantly different from  
139 the 8-species mixtures ( $F_{1,37.1} = 5.34$  and  $P = 0.026$ ). Among the three low diversity levels,  
140 the 2-species mixtures had significantly greater log ratios than 4-species mixtures and  
141 monocultures ( $F_{1,39.2} = 4.44$ ,  $P = 0.042$ ).

142 Next, we tested whether the presence of particular plant functional groups influenced  
143 the increase in productivity in communities of co-selected plants at the 2- and 4-species  
144 richness levels; especially as legumes are known to drive over-yielding in grasslands<sup>36</sup>. The  
145 presence of legumes and other plant functional groups, however, did not provide any further  
146 explanation for our results. Species-level productivity within communities was higher for the

147 majority of plant species with a co-selection history, irrespective of functional-group identity  
148 (Fig. 4). Naïve communities showed more even species abundance distributions ( $F_{1,132.2} =$   
149 4.28,  $P = 0.041$ ; Extended Data Table 2), mainly due to the lower evenness of communities  
150 of co-selected plants in the unsterilized native soil treatment (Extended Data Fig. 3). Over the  
151 course of the experiment, evenness decreased similarly in communities of co-selected plants  
152 and naïve communities (Extended Data Table 2).

153 Finally, we analysed changes in within-species trait variation along the species  
154 richness gradient as a potential mechanism contributing to the difference in productivity  
155 between communities of co-selected plants and naïve communities<sup>37</sup>. Within-species  
156 variation in specific leaf area (SLA) decreased for communities of co-selected plants and  
157 increased for naïve communities with increasing species richness (Fig. 5;  $F_{1,69.2} = 4.87$ ,  $P =$   
158 0.031 for interaction of log species richness with plant history).

159

## 160 **Discussion**

161 Our results show that eight years of community evolution in a biodiversity experiment  
162 can increase biodiversity effects on community productivity, suggesting that this may at least  
163 in part explain why biodiversity effects commonly increase over time in such experiments<sup>8–</sup>  
164 <sup>10,15</sup>. The greater productivity in communities consisting of co-selected plants compared to  
165 communities consisting of naïve plants was particularly evident in communities comprised of  
166 two or four species. One might claim that these effects were because we purchased the plant  
167 material of co-selected and naïve plants at two different points in time. We argue that this is  
168 not the case for the following reasons. First, co-selected and naïve plants were obtained for  
169 52 different species and for each of them there were different community-specific co-  
170 selection histories. Second, 8-species mixtures with and without co-selection history showed  
171 the same productivity. In other words, because the positive effect of the community-evolution

172 treatment was not statistically evident in the 8-species mixtures but strong in 2- and 4-  
173 species mixtures, this effect was unlikely simply due to initial differences in plant material.

174         Why was the community-evolution treatment not effective at the highest richness  
175 level tested? It is conceivable that selection pressure was dampened in communities where  
176 more than four species co-occurred. For instance, during initial establishment in a diverse  
177 community, each individual can have a very different set of immediate neighbours that could  
178 constrain the consistency in the selection pressure on individuals within a community. With  
179 fewer species in a mixture, the potential for the evolution of increased complementarity  
180 between plant species should be greater, given the relative constancy of the neighbours any  
181 given plant experiences. The greater proportional (but not absolute) increase of productivity  
182 in communities of co-selected plant species at the 2-species level than at the 4-species  
183 richness level, and the absence of such an increase at the 8-species richness level, are  
184 compatible with the idea that evolution for co-adaptation is stronger at low than at high  
185 diversity. At low diversity, intraspecific densities are higher and thus the chance for a  
186 uniform selection pressure across all intraspecific individuals is greater. As a consequence,  
187 there might be an upper limit of species richness beyond which selection is unlikely to  
188 strengthen biodiversity effects<sup>1</sup>. Additionally, community evolution leading to increased plant  
189 growth and productivity in diverse mixtures may be at the expense of reduced pathogen  
190 defence<sup>38</sup>. This may explain why 8-species mixtures were initially much more productive in  
191 neutral than in native soil.

192         The performance of the naïve communities in the current study over the four years  
193 was comparable to the initial performance of the ancestral community of the co-selected  
194 plants (2003–2006). This similarity supports the view that the observed results at 2- and 4-  
195 species richness levels in communities of co-selected compared with communities of naïve  
196 plants are likely due to diversity-dependent community evolution. Indeed, the naïve



197 communities did not catch up with the communities of co-selected plants during the course of  
198 the current experiment and differences in productivity from 2012 to 2015 even increased  
199 between the two community-evolution treatments (Fig. 2). With regard to underlying  
200 evolutionary mechanisms, this suggests that in our study community evolution was not or at  
201 least not solely due to an immediate sorting out of genotypes from standing variation<sup>17</sup> during  
202 seedling establishment and initial growth.

203         The driving force behind community evolution for greater productivity at low  
204 diversity could have been related to particular species compositions<sup>6</sup>. There was, however, no  
205 evidence for any plant functional-group specific effect typically found in other contexts of  
206 biodiversity–ecosystem functioning research<sup>36,39</sup>. In fact, the majority of species produced  
207 greater biomass in communities of co-selected plants and evenness was only slightly reduced  
208 in these communities compared with communities of naïve plants.

209         Intraspecific variation in SLA decreased in communities of co-selected plants and  
210 increased in naïve communities with increasing species richness (Fig. 5), a result in line with  
211 previous findings for SLA in grassland species<sup>40</sup>. The increased within-species variation in  
212 monocultures suggests an evolutionary broadening of niches to benefit from a wider range of  
213 light conditions. In contrast, within-species trait variation may be less important in mixtures,  
214 due to the inherently lower intraspecific density at greater richness. The narrowing of within-  
215 species variation with increasing diversity in communities of co-selected plants could be an  
216 expected consequence of character displacement between species<sup>6</sup>. In relative terms, it  
217 seemed that species in naïve communities had not yet responded to different diversity  
218 treatments with an adjustment of within-species variation in the four years of this study. A  
219 more heterogeneous biotic environment may have caused their higher variation at high  
220 diversity.

221 Selected plants also had greater productivity than naïve plants in monoculture. The  
222 adaptation of selected plants to monoculture environments could have been due to the  
223 evolution of increased (belowground) pathogen defence<sup>41</sup> or greater niche width<sup>42</sup>. Assuming  
224 soil-borne plant pathogens accumulated over time<sup>14</sup>, in particular in the initially sterilized  
225 treatments, the decrease in monoculture productivity in naïve communities (Fig. 2) would be  
226 consistent with the hypothesis of increased pathogen defence in selected communities<sup>41</sup>.  
227 Assuming a correlation between resource-uptake and trait-based niches<sup>43</sup>, the increase in  
228 within-species variation in SLA in monocultures of selected plants (Fig. 5) would be  
229 consistent with the second explanation related to niche width.

230 Positive plant diversity–productivity relationships may not only be driven by  
231 complementary resource use, and thus increased performance at high diversity<sup>11,12</sup>, but also  
232 by pathogen accumulation in the soil and thus reduced performance at low diversity<sup>14</sup>.  
233 Previous studies in the context of biodiversity–ecosystem functioning research have reported  
234 negative plant–soil feedbacks in native as opposed to neutral soils<sup>32,44,45</sup>. Consequently, an  
235 increase of biodiversity effects during community evolution could also be due to the presence  
236 of co-selected soil biota. In our study, however, the outcome of the community-evolution  
237 treatment in mixtures was largely independent of the presence of co-selected soil biota. The  
238 generally lower productivity for both communities of co-selected plants and naïve  
239 communities in native soil, and with time in neutral soil, may have occurred through nutrient  
240 depletion or pathogen accumulation in all soil treatments. It is conceivable that co-evolution  
241 of plants with soil biota in our experimental systems was not effective because the large  
242 population sizes and short generation times of most soil organisms contributed to the re-  
243 assembly and fast evolution of soil communities<sup>24</sup>. Another explanation could be that  
244 microbes were dispersed via wind-blown particles to adjacent plots thereby potentially

245 making the microbial communities less different in composition than if the plots would have  
246 been separated more in space.

247 Changes in the performance of individual species selected in different species  
248 diversity levels and tested under experimental abiotic or biotic conditions have been observed  
249 in previous studies<sup>6,25-27</sup>. In our study, we demonstrated for the first time that changes in the  
250 performance of entire plant communities over time depend on a history of co-selection  
251 among the plants species of the assembled mixtures. We suggest that these changes are the  
252 result of community evolution because they were maintained through seed production in an  
253 experimental garden and propagation of seedlings in a glasshouse to the replanting of  
254 communities in the field. However, we cannot exclude maternal carry-over and epigenetic  
255 changes<sup>46</sup> as additional potential evolutionary mechanisms. Independent of the mechanism,  
256 an ecosystem with individuals adapted to optimize the use of the local resources by reducing  
257 interspecific competition will be a well-functioning and sustainable system. Our new findings  
258 suggest that it is not sufficient to preserve species outside a community context for the  
259 conservation of biodiversity and its beneficial influence on ecosystem functioning and  
260 services. To protect species interactions and ecosystem functioning more efficiently, novel  
261 strategies should consider the conservation of entire communities or at least subsets of these.  
262 Our results emphasize that this is especially critical for less diverse communities, which may  
263 already suffer from the loss of some of their constituents.

264

## 265 **Methods**

266 **Study site.** The present study was conducted at the Jena Experiment field site (Jena,  
267 Thuringia, Germany, 51°N, 11°E, 135m a.s.l.) from 2011 to 2015. The Jena Experiment is a  
268 long-term biodiversity field experiment located in the floodplain of the river Saale where 60

269 Central European grassland species have been grown in a number of species combinations  
270 since 2002<sup>25</sup>.

271 **Community-evolution treatment.** The 48 experimental plant communities of this study  
272 included twelve monocultures (of which one had to be removed from all analyses because it  
273 was planted with the wrong species), twelve 2-species mixtures, twelve 4-species mixtures  
274 and twelve 8-species mixtures. We used two community-evolution treatments; plants with  
275 eight years of co-selection history in 48 different plant communities in the Jena Experiment  
276 (communities of co-selected plants) and plants without such co-selection history in the Jena  
277 Experiment (naïve communities). The plant seeds of naïve communities were obtained from  
278 the same commercial seed supplier (Rieger Hofmann GmbH, in Blaufelden-Raboldshausen,  
279 Germany) as the seeds used for the establishment of the original communities of the Jena  
280 Experiment. This supplier collected plants of the different species at field sites in Germany  
281 and propagated them for at least five years in monoculture, reseeding them every year. Seeds  
282 of communities of co-selected plants were produced in an experimental garden in Zurich,  
283 Switzerland, from cuttings that had been made in the Jena Experiment and were then planted  
284 in Zurich in the original species combination in plots fenced with plastic netting to reduce  
285 pollination between communities. To obtain sufficient numbers of seeds from communities  
286 of co-selected plants, a small number was additionally collected directly in the plots of the  
287 Jena Experiment. All these seeds were thus offspring of plant populations that had been sown  
288 in 2002 and grown until 2010 in plots of the Jena Experiment.

289 The seeds of communities of co-selected plants and naïve communities were  
290 germinated in potting soil (BF4, De Baat; Holland) in mid-January 2011 in a glasshouse in  
291 Zurich. In March 2011, the seedlings were transported back to the field site of the Jena  
292 Experiment and planted within 2 x 2 m subplots of the original plots (Extended Data Fig. 1).  
293 There were four 1 x 1 m quadrats with different soil treatments in each (see next section).

294 Each quadrat was further divided into two 1 x 0.5 m halves. The seedlings of communities of  
295 co-selected plants were transplanted into one half and seedlings of naïve communities into  
296 the other half of each quadrat at a density of 210 plants per m<sup>2</sup> with a 6-cm distance between  
297 individuals in a hexagonal pattern (Extended Data Fig. 1). Species were planted in equal  
298 proportions, but if a species was no longer present in an original plot of the Jena Experiment  
299 it was excluded from both communities of co-selected plants and naïve communities. Five  
300 plant species were excluded in total. The seedlings received water every second day for six  
301 weeks after transplanting to ensure the plants established.

302 **Soil treatment.** Within each 2 x 2 m subplot of the 48 plots of the Jena Experiment used for  
303 the present study, the original plant cover was removed in September 2010 (and used for the  
304 plant propagation in the experimental garden in Zurich, see previous section), and the soil  
305 was excavated to a depth of 0.35 m and sieved. To minimize exchange of soil components  
306 between quadrats within subplots and with the surrounding soil, two 5-cm layers of sand  
307 were added to the bottom of the plots and separated with a 0.5 mm mesh net. The borders of  
308 the quadrats and the subplots were separated by plastic frames (Extended Data Fig. 1). Using  
309 the excavated original soil from each of the plots, four soil treatments were prepared. First,  
310 half of the soil (approximately 600 kg per plot) was gamma-sterilized to remove the original  
311 soil community. Half of the gamma-sterilized soil was then inoculated with 4 % (by weight)  
312 of live sugar-beet soil and 4 % of sterilized original soil of the corresponding plot (“neutral  
313 soil” obtained by inoculation). Live sugar-beet soil was added to create a natural, but neutral  
314 soil community and was previously collected in an agricultural sugar-beet field not associated  
315 with the Jena Experiment, but with comparable soil properties. The other half of the gamma-  
316 sterilized soil was inoculated with 4 % (by weight) of live sugar-beet soil and 4 % of live  
317 original soil of the corresponding plot (“native soil” obtained by inoculation). The other half  
318 of the soil was unsterilized and used for the other two soil treatments. Half of this soil was

319 filled back into one quadrat of the corresponding plot (“native soil”). The other half of the  
320 unsterilized soil was mixed among all plots and filled into the remaining quadrats. This fourth  
321 soil treatment was abandoned after two years because the plant community was excavated for  
322 another experiment. Therefore, this treatment is not included in the present study.

323 Before the soils were added into the quadrats in December 2010, they were rested in  
324 the field in closed bags to allow for the soil chemistry to equalize and to encourage soil biota  
325 of the inocula to colonize the sterilized soil before planting. After the soil was added, all  
326 quadrats were covered with a net and a water permeable black sheet to avoid spilling between  
327 quadrats until the seedlings were transplanted in March 2011.

328 **Maintenance and data collection.** We maintained the test communities by weeding three  
329 times a year and by cutting the plants twice a year at typical grassland harvest times (late  
330 May and August) in central Europe. To measure productivity, we harvested plant material 3  
331 cm aboveground from a 50 x 20 cm area in the centre of each half-quadrat, sorted it into  
332 species, dried it at 70°C and weighed the dry biomass.

333 **SLA measurements.** At the end of the experiment, in May 2015, we measured specific leaf  
334 area (SLA) for 30 species in neutral soil. For each species, we collected up to 20  
335 representative leaves (depending on the leaf size of the species) from four individuals and  
336 measured the leaf area by scanning fresh leaves with a Li-3100 Area Meter (Li-cor Inc.,  
337 Lincoln, Nebraska, USA) immediately after harvest and determining the mass of the same  
338 leaves after drying.

339 **T-RFLP assay.** Terminal restricted fragment length polymorphism (T-RFLP) targeting the  
340 16S RNA was used to characterize the composition of the soil bacterial communities<sup>47</sup>. In  
341 April 2011, four soil samples per quadrat were extracted and pooled to assess the  
342 establishment of soil microbial communities and to test whether soil treatments were distinct.

343 In 2012, a further set of soil samples was taken and analysed to confirm the establishment of  
344 different soil biotic treatments. T-RFLP soil analyses revealed that bacterial communities of  
345 the soil treatments remained distinct: each soil treatment had a characteristic bacterial  
346 composition both one and two years after planting, with some overlap (Extended Data Table  
347 3).

348 **Statistical analysis.** We analysed the data from the four spring harvests 2012, 2013, 2014  
349 and 2015, which corresponded to peak aboveground plant biomass values. We analysed plant  
350 biomass ( $\text{g/m}^2$ ) as a function of the design variables using mixed models and summarized  
351 results in analyses of variance (ANOVA) tables (e.g. Extended Data Table 1). Significance  
352 tests were based on approximate F-tests using appropriate error terms and denominator  
353 degrees of freedom.

354 The fixed terms in the model were species richness of the original plots of the Jena  
355 Experiment (factor with 4 levels: facSR), year of harvest (factor with 4 levels: Har), soil  
356 treatment (factor with 3 levels: SH), community-evolution treatment (communities of co-  
357 selected plants vs. naïve communities: PH) and interactions of these. The random terms were  
358 plot, quadrat, half-quadrat and their interactions with year of harvest. Statistical analyses  
359 were conducted using the software R, version 3.2.3<sup>48</sup>. Mixed models using residual maximum  
360 likelihood (REML) were fitted using the package ASReml for R<sup>49</sup>.

361 Within-species variation in SLA was calculated as the within-species variance  
362 component for each community (residual mean square after fitting species). We had  
363 insufficient trait data to test for increased between-species variation in communities of co-  
364 selected plants containing a mixture of species.

365 The calculation of operational taxonomic units (OTUs) from the T-RFLP raw data  
366 (restriction enzyme products) was done using the T-RFLP processing software T-REX<sup>50</sup> for

367 each soil treatment and year separately and the soil-specific outputs were then compared with  
368 an analysis of similarities (anosim() function of the vegan package<sup>51</sup>).

369

## 370 **References**

371

372 1. Cardinale, B. J. *et al.* Biodiversity loss and its impact on humanity. *Nature* **486**, 59–67

373 (2012).

374 2. Huston, M. A. Hidden treatments in ecological experiments: re-evaluating the ecosystem  
375 function of biodiversity. *Oecologia* **110**, 449–460 (1997).

376 3. Tilman, D., Lehman, C. L. & Thomson, K. T. Plant diversity and ecosystem productivity:  
377 theoretical considerations. *Proc. Natl. Acad. Sci.* **94**, 1857–1861 (1997).

378 4. Loreau, M. & Hector, A. Partitioning selection and complementarity in biodiversity  
379 experiments. *Nature* 72–76 (2001).

380 5. Thorpe, A. S., Aschehoug, E. T., Atwater, D. Z. & Callaway, R. M. Interactions among  
381 plants and evolution: Plant interactions and evolution. *J. Ecol.* **99**, 729–740 (2011).

382 6. Zuppinge-Dingley, D. *et al.* Selection for niche differentiation in plant communities  
383 increases biodiversity effects. *Nature* **515**, 108–111 (2014).

384 7. Balvanera, P. *et al.* Quantifying the evidence for biodiversity effects on ecosystem  
385 functioning and services: Biodiversity and ecosystem functioning/services. *Ecol. Lett.* **9**,  
386 1146–1156 (2006).

387 8. Reich, P. B. *et al.* Impacts of biodiversity loss escalate through time as redundancy fades.  
388 *Science* **336**, 589–592 (2012).

389 9. Cardinale, B. J. *et al.* Impacts of plant diversity on biomass production increase through  
390 time because of species complementarity. *Proc. Natl. Acad. Sci.* **104**, 18123–18128  
391 (2007).



- 392 10. Meyer, S. T. *et al.* Effects of biodiversity strengthen over time as ecosystem functioning  
393 declines at low and increases at high biodiversity. *Ecosphere* **7**, e01619 (2016).
- 394 11. Mueller, K. E., Tilman, D., Fornara, D. A. & Hobbie, S. E. Root depth distribution and  
395 the diversity–productivity relationship in a long-term grassland experiment. *Ecology* **94**,  
396 787–793 (<https://doi.org/10.1890/0014-1801-2012-0281>).
- 397 12. Roscher, C., Thein, S., Schmid, B. & Scherer-Lorenzen, M. Complementary nitrogen use  
398 among potentially dominant species in a biodiversity experiment varies between two  
399 years. *J. Ecol.* **96**, 477–488 (2008).
- 400 13. Fornara, D. A. & Tilman, D. Plant functional composition influences rates of soil carbon  
401 and nitrogen accumulation. *J. Ecol.* **96**, 314–322 (2008).
- 402 14. Schnitzer, S. A. *et al.* Soil microbes drive the classic plant diversity–productivity pattern.  
403 *Ecology* **92**, 296–303 (2011).
- 404 15. Fargione, J. *et al.* From selection to complementarity: shifts in the causes of biodiversity-  
405 productivity relationships in a long-term biodiversity experiment. *Proc. R. Soc. B Biol.*  
406 *Sci.* **274**, 871–876 (2007).
- 407 16. Whitham, T. G. *et al.* A framework for community and ecosystem genetics: from genes  
408 to ecosystems. *Nat. Rev. Genet.* **7**, 510–523 (2006).
- 409 17. Anderson, J. T., Willis, J. H. & Mitchell-Olds, T. Evolutionary genetics of plant  
410 adaptation. *Trends Genet.* **27**, 258–266 (2011).
- 411 18. Fakheran, S. *et al.* Adaptation and extinction in experimentally fragmented landscapes.  
412 *Proc. Natl. Acad. Sci.* **107**, 19120–19125 (2010).
- 413 19. Yoshida, T., Jones, L. E., Ellner, S. P., Fussmann, G. F. & Hairston, N. G. Rapid  
414 evolution drives ecological dynamics in a predator–prey system. *Nature* **424**, 303–306  
415 (2003).

- 416 20. Fiegna, F., Moreno-Letelier, A., Bell, T. & Barraclough, T. G. Evolution of species  
417 interactions determines microbial community productivity in new environments. *ISME J.*  
418 **9**, 1235–1245 (2014).
- 419 21. Lawrence, D. *et al.* Species interactions alter evolutionary responses to a novel  
420 environment. *PLoS Biol.* **10**, e1001330 (2012).
- 421 22. Fiegna, F., Scheuerl, T., Moreno-Letelier, A., Bell, T. & Barraclough, T. G. Saturating  
422 effects of species diversity on life-history evolution in bacteria. *Proc. R. Soc. B Biol. Sci.*  
423 **282**, 20151794 (2015).
- 424 23. Strauss, S. Y., Lau, J. A., Schoener, T. W. & Tiffin, P. Evolution in ecological field  
425 experiments: implications for effect size. *Ecol. Lett.* **11**, 199–207 (2008).
- 426 24. Lau, J. A. & Lennon, J. T. Rapid responses of soil microorganisms improve plant fitness  
427 in novel environments. *Proc. Natl. Acad. Sci.* **109**, 14058–14062 (2012).
- 428 25. Kleynhans, E. J., Otto, S. P., Reich, P. B. & Vellend, M. Adaptation to elevated CO<sub>2</sub> in  
429 different biodiversity contexts. *Nat. Commun.* **7**, 12358 (2016).
- 430 26. Rottstock, T., Kummer, V., Fischer, M. & Joshi, J. Rapid transgenerational effects in  
431 *Knautia arvensis* in response to plant community diversity. *J. Ecol.* **105**, 714–725 (2017).
- 432 27. Lipowsky, A., Schmid, B. & Roscher, C. Selection for monoculture and mixture  
433 genotypes in a biodiversity experiment. *Basic Appl. Ecol.* **12**, 360–371 (2011).
- 434 28. Dimitrakopoulos, P. G. & Schmid, B. Biodiversity effects increase linearly with biotope  
435 space. *Ecol. Lett.* **7**, 574–583 (2004).
- 436 29. Jousset, A., Schulz, W., Scheu, S. & Eisenhauer, N. Intraspecific genotypic richness and  
437 relatedness predict the invasibility of microbial communities. *ISME J.* **5**, 1108–1114  
438 (2011).
- 439 30. Roscher, C. *et al.* The role of biodiversity for element cycling and trophic interactions: an  
440 experimental approach in a grassland community. *Basic Appl. Ecol.* **5**, 107–121 (2004).

- 441 31. Kardol, P., Cornips, N. J., van Kempen, M. M. L., Bakx-Schotman, J. M. T. & van der  
442 Putten, W. H. Microbe-mediated plant-soil feedback causes historical contingency effects  
443 in plant community assembly. *Ecol. Monogr.* **77**, 147–162 (2007).
- 444 32. Klironomos, J. N. Feedback with soil biota contributes to plant rarity and invasiveness in  
445 communities. *Nature* **417**, 67–70 (2002).
- 446 33. Wagg, C., Boller, B., Schneider, S., Widmer, F. & van der Heijden, M. G. A.  
447 Intraspecific and intergenerational differences in plant-soil feedbacks. *Oikos* **124**, 994–  
448 1004 (2015).
- 449 34. Hector, A. *et al.* Plant diversity and productivity experiments in European grasslands.  
450 *Science* **286**, 1123–1127 (1999).
- 451 35. Gebremikael, M. T., De Waele, J., Buchan, D., Soboksa, G. E. & De Neve, S. The effect  
452 of varying gamma irradiation doses and soil moisture content on nematodes, the  
453 microbial communities and mineral nitrogen. *Appl. Soil Ecol.* **92**, 1–13 (2015).
- 454 36. Spehn, E. M. *et al.* The role of legumes as a component of biodiversity in a cross-  
455 European study of grassland biomass nitrogen. *Oikos* **98**, 205–218 (2002).
- 456 37. Siefert, A. *et al.* A global meta-analysis of the relative extent of intraspecific trait  
457 variation in plant communities. *Ecol. Lett.* **18**, 1406–1419 (2015).
- 458 38. Lemmermeyer, S., Lörcher, L., van Kleunen, M. & Dawson, W. Testing the plant  
459 growth-defense hypothesis belowground: do faster-growing herbaceous plant species  
460 suffer more negative effects from soil biota than slower-growing ones? *Am. Nat.* **186**,  
461 264–271 (2015).
- 462 39. Hooper, D. U. & Vitousek, P. M. The effects of plant composition and diversity on  
463 ecosystem processes. *Science* **277**, 1302–1305 (1997).
- 464 40. Gubsch, M. *et al.* Differential effects of plant diversity on functional trait variation of  
465 grass species. *Ann. Bot.* **107**, 157–169 (2011).

- 466 41. Zuppinger-Dingley, D., Flynn, D. F. B., De Deyn, G. B., Petermann, J. S. & Schmid, B.  
467 Plant selection and soil legacy enhance long-term biodiversity effects. *Ecology* **97**, 918–  
468 928 (2016).
- 469 42. Bazzaz, F. A. *Plants in Changing Environments: Linking Physiological, Population, and*  
470 *Community Ecology*. (Cambridge University Press, 1996).
- 471 43. Roscher, C., Schumacher, J., Schmid, B. & Schulze, E.-D. Contrasting effects of  
472 intraspecific trait variation on trait-based niches and performance of legumes in plant  
473 mixtures. *PloS One* **10**, e0119786 (2015).
- 474 44. Petermann, J. S., Fergus, A. J., Turnbull, L. A. & Schmid, B. Janzen-Connell effects are  
475 widespread and strong enough to maintain diversity in grasslands. *Ecology* **89**, 2399–  
476 2406 (2008).
- 477 45. Cortois, R., Schröder-Georgi, T., Weigelt, A., van der Putten, W. H. & De Deyn, G. B.  
478 Plant-soil feedbacks: role of plant functional group and plant traits. *J. Ecol.* **104**, 1608–  
479 1617 (2016).
- 480 46. Verhoeven, K. J. F., vonHoldt, B. M. & Sork, V. L. Epigenetics in ecology and evolution:  
481 what we know and what we need to know. *Mol. Ecol.* **25**, 1631–1638 (2016).
- 482 47. Liu, W. T., Marsh, T. L., Cheng, H. & Forney, L. J. Characterization of microbial  
483 diversity by determining terminal restriction fragment length polymorphisms of genes  
484 encoding 16S rRNA. *Appl. Environ. Microbiol.* **63**, 4516–4522 (1997).
- 485 48. R Core Team. R: A language and environment for statistical computing. R Foundation for  
486 Statistical Computing, Vienna, Austria. URL <https://www.R-project.org/> (2015).
- 487 49. Butler, D. asreml: asreml() fits the linear mixed model. R package version 3.0.  
488 [www.vsni.co.uk](http://www.vsni.co.uk) (2009).
- 489 50. Culman, S.W., Bukowski, R., Gauch, H.G., Cadillo-Quiroz, H. & Buckley, D.H. T-REX:  
490 software for the processing and analysis of T-RFLP data. *BMC Bioinf.* **10**, 171 (2009).

491 51. Oksanen, J. *et al.* vegan: Community Ecology Package. R package version 2.3-4.  
492 <https://CRAN.R-project.org/package=vegan> (2016).

493

494 **Online content** Methods, along with additional Extended Data display items and Source  
495 Data, are available in the online version of the paper; references unique to these sections  
496 appear only in the online paper.

497

498 **Supplementary Information** is available in the online version of the paper.

499

## 500 **Acknowledgements**

501 Thanks to the Jena Experiment for providing infrastructure and help, to D. Trujillo and M.  
502 Furler for technical assistance and to H. Martens for the lab work for the T-RFLP analyses.  
503 Thanks to V. Yadav for the establishment of the plots. We thank Tim Paine, Marc Cadotte  
504 and Mark van Kleunen for helpful comments on an earlier draft. This study was supported by  
505 the Swiss National Science Foundation (grant numbers 130720, 147092 and 166457 to B.S.)  
506 and the University Research Priority Program Global Change and Biodiversity of the  
507 University of Zurich. The Jena Experiment is funded by The Deutsche  
508 Forschungsgemeinschaft (DFG, German Research Foundation, FOR1451).

509

## 510 **Author contributions**

511 B.S., D.B.F. and G.B.D.D. conceived the project; D.Z.-D. set up the experiment; S.J.V.M.,  
512 T.H. and D.Z.-D. carried out the experiment; B.S., C.W., S.J.V.M. and T.H. analysed the  
513 data; D.B.F. analysed the TRFLP data; B.S., S.J.V.M., T.H. and C.W. wrote the first draft of  
514 the manuscript. All authors contributed to the final manuscript.

515

516 **Author information**

517 The authors declare no competing financial interests. Correspondence and requests for  
518 materials should be addressed to S.J.V.M. ([sofia.vanmoorsel@ieu.uzh.ch](mailto:sofia.vanmoorsel@ieu.uzh.ch)) or B.S.  
519 ([bernhard.schmid@ieu.uzh.ch](mailto:bernhard.schmid@ieu.uzh.ch)).

520

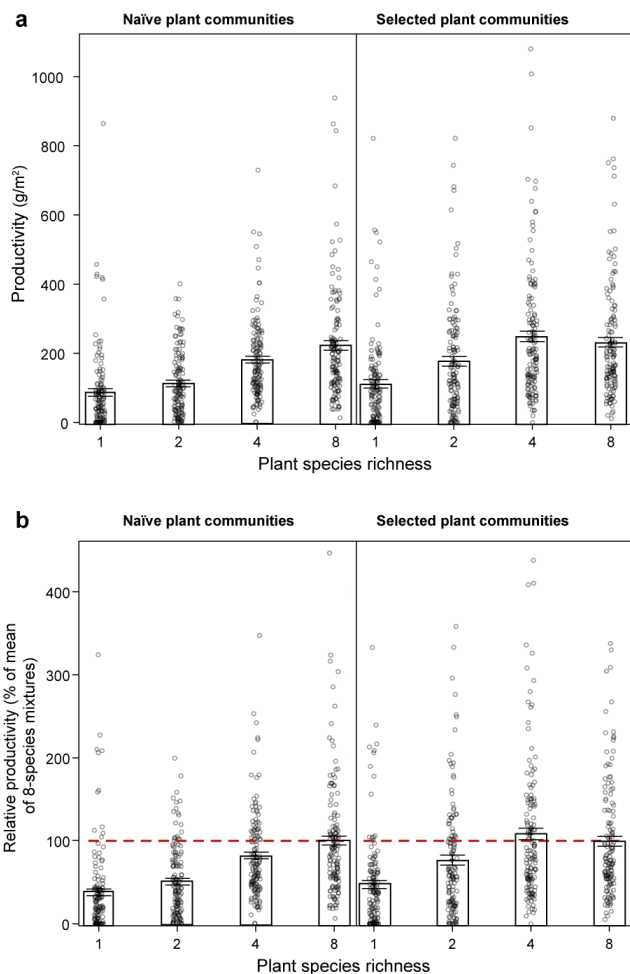

521

522 **Figure 1 | Community productivity for naïve communities and communities of co-**

523 **selected plants at different species-richness levels. a, Peak community aboveground**

524 **biomass (g/m<sup>2</sup>). Communities of co-selected plants (right panel) had slightly increased**

525 **productivity in monocultures, more strongly increased productivity in 2- and 4-species**

526 **mixtures, but similar productivity in 8-species mixtures as naïve communities (left panel). b,**

527 **as in (a) but showing relative productivity (% of mean productivity of 8-species mixtures per**

528 **plant history-by-soil treatment-by-year combination). Means and standard errors are shown.**

529 **Raw data plotted as points.**

530

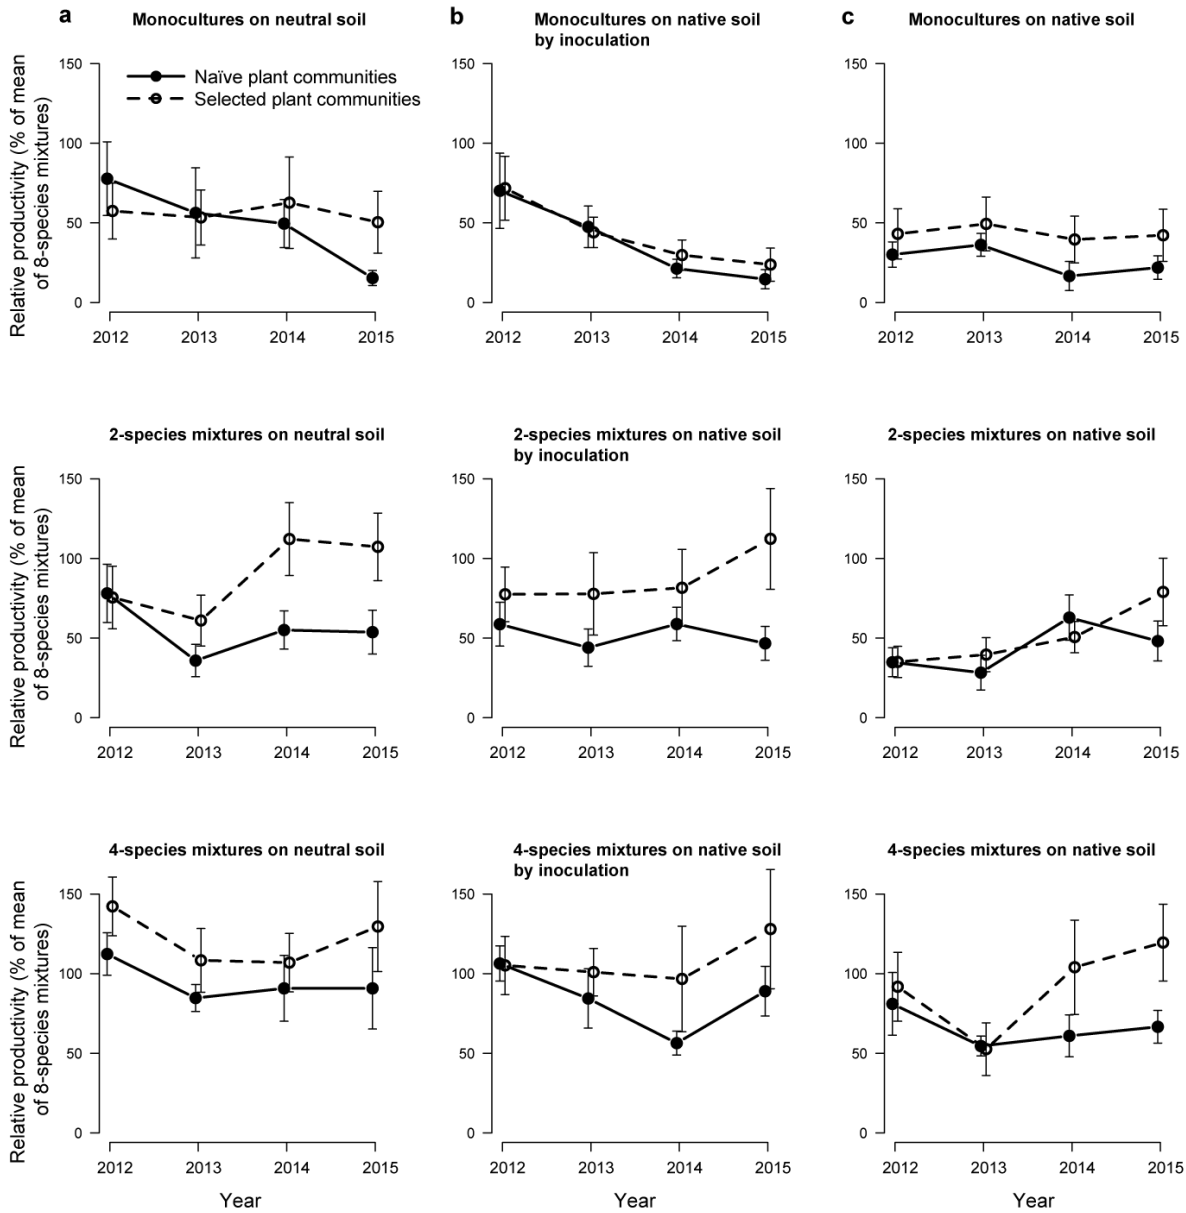



534 **Figure 2 | Relative productivity (% of mean of 8-species mixture) for naïve communities**  
535 **and communities of co-selected plants in neutral soil without or in native soil with co-**  
536 **selected soil biota.**

537 Relative productivity of communities of co-selected plants (dashed lines, open circles) and  
538 naïve communities (solid lines, closed circles) in monocultures and 2- and 4-species mixtures  
539 in **a**, neutral soil (sterilized soil with neutral inoculum) **b**, native soil obtained by inoculation  
540 (sterilized soil with neutral inoculum and inoculum of co-selected soil biota from original  
541 plots) and **c**, native soil (unsterilized soil with co-selected soil biota from original plots). Raw  
542 means and standard errors are shown (for significances see Extended Data Table 1b).

543

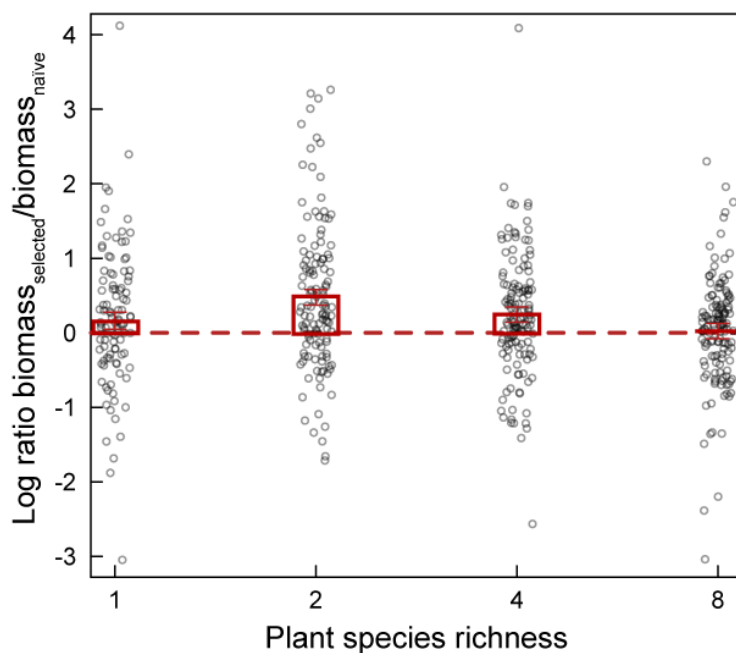

544

545 **Figure 3 | Log ratio of productivity in communities of co-selected plants ( $bm_{\text{selected}}$ ) and**  
546 **productivity in naïve communities ( $bm_{\text{naïve}}$ ) across years and soil treatments.** In 8-species  
547 mixtures, productivity did not differ between communities of co-selected and naïve plants  
548 (ratio=0). Especially in 2- and 4-species mixtures, but also in monocultures, communities of  
549 co-selected plants produced more biomass than naïve communities. Means and standard  
550 errors are shown. Raw data are plotted in the background.

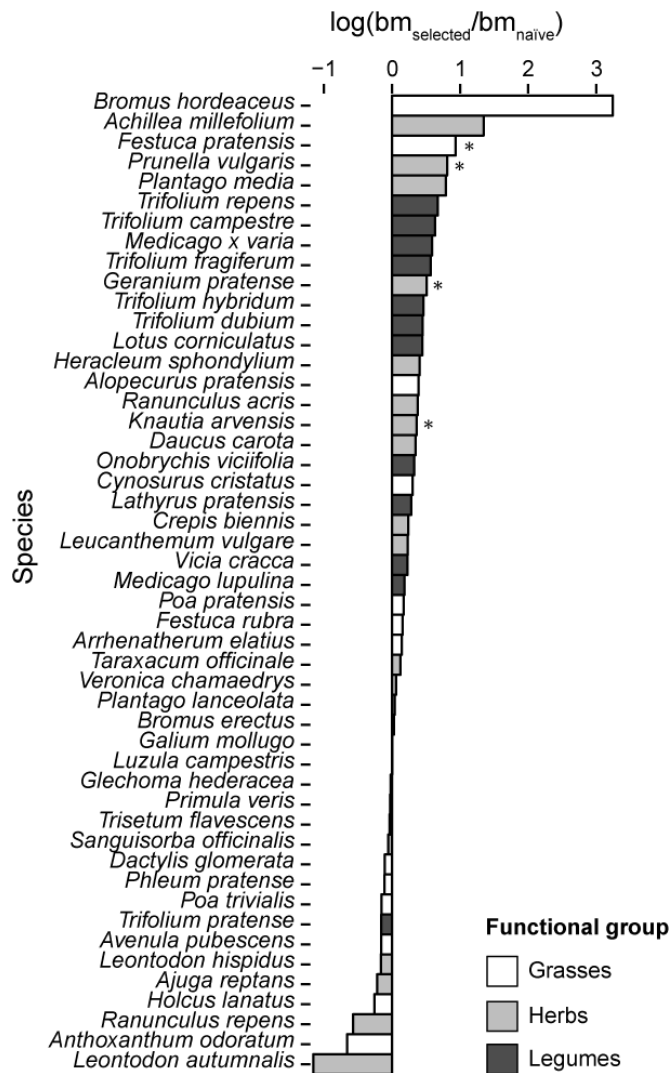

551

552 **Figure 4 | Log-transformed species biomass ratios between co-selected and naïve plants.**

553 The majority of plant species attained greater aboveground biomass in communities of co-

554 selected plants compared with naïve communities. The studied plant species belong to three

555 different functional groups: grasses (white bars), herbs (light grey bars) and legumes (dark

556 grey bars). Data are for each species across the four experimental years, across soil

557 treatments and across species richness levels and species compositions of communities ( $n =$

558 32–352). Three species with  $n < 32$  were excluded from the analysis (*Anthriscus sylvestris*,

559 *Campanula patula* and *Cardamine pratensis*). The stars represent  $P$ -values  $< 0.05$  for species

560 tested separately.

561

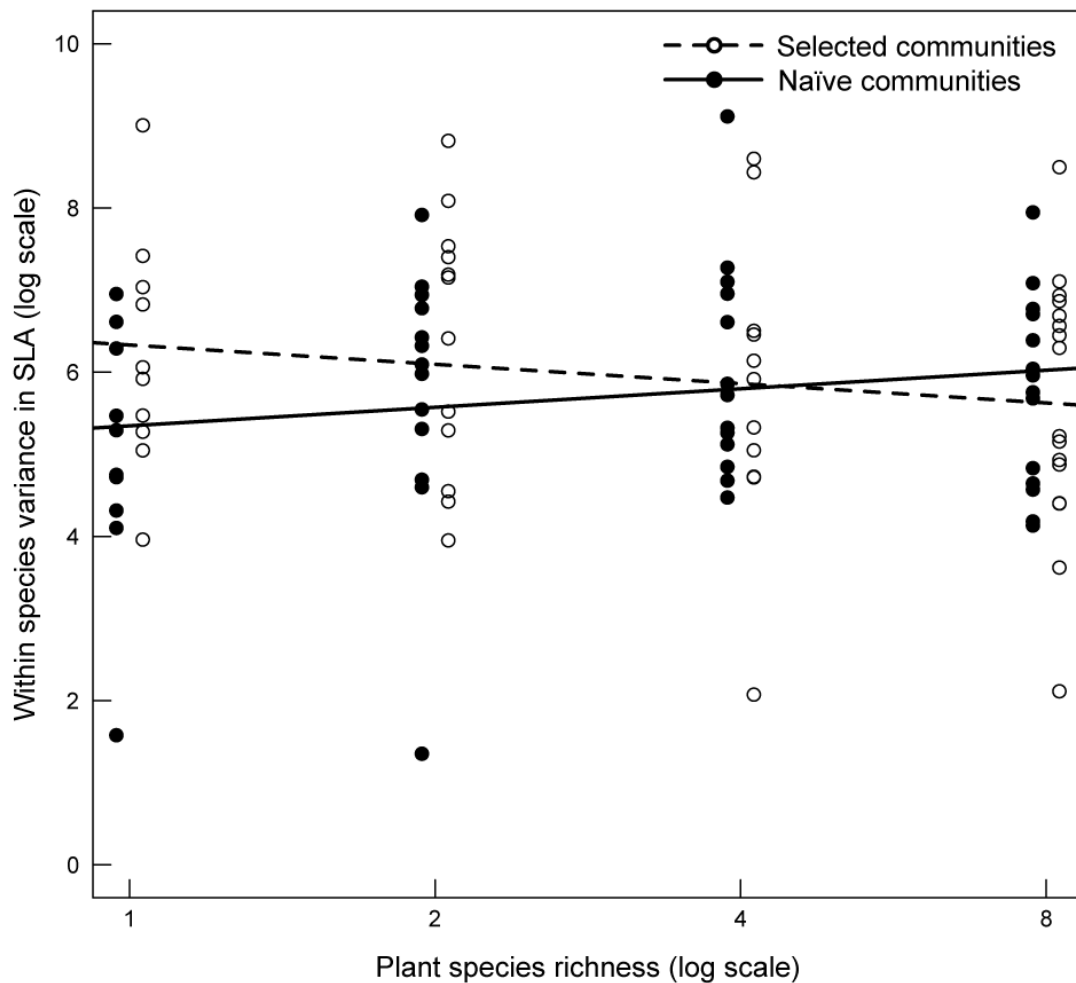

562

563 **Figure 5 | Within-species variation in specific leaf area (SLA) for communities of co-**  
564 **selected plants and naïve communities at the end of the experiment in 2015 in neutral**  
565 **soil.** In monocultures within-species variation in SLA (measured as the within-species  
566 variance component in analysis of variance) was greater for co-selected than for naïve plants  
567 and this difference decreased with increasing species richness. Open circles and dashed line  
568 refer to communities of co-selected plants, closed circles and solid line refer to naïve  
569 communities. The interaction of log(species richness) and plant history was significant ( $F_{1,69.2}$   
570  $= 4.87, P = 0.031$ ).
